# Supplementary material for: Predicting Preventive Behaviors Toward Alcohol Consumption Among University Students Using the Theory of Planned Behavior
Source: Research Square preprint supplement (doi:10.21203/rs.3.rs-7421824/v1), 2025-09-29
Supplement: Supplementary file 1 [file 419f38a535cf3fdb0593ef25.docx]

In the Name of God

**TPB-Based Questionnaire for Assessing Preventive Behaviors toward Alcohol Consumption in University Students**

| 1 | In my opinion, drinking alcohol helps a person feel relaxed. | Strongly agree | Agree | Neutral | Disagree | Strongly disagree |
| --- | --- | --- | --- | --- | --- | --- |
| 2 | In my opinion, drinking alcohol leads to academic decline. | Strongly agree | Agree | Neutral | Disagree | Strongly disagree |
| 3 | In my opinion, drinking alcohol increases a person’s self-confidence. | Strongly agree | Agree | Neutral | Disagree | Strongly disagree |
| 4 | In my opinion, drinking alcohol has a negative effect on mental health. | Strongly agree | Agree | Neutral | Disagree | Strongly disagree |
| 5 | In my opinion, drinking alcohol occasionally and for fun is not a problem. | Strongly agree | Agree | Neutral | Disagree | Strongly disagree |
| 6 | In my opinion, drinking alcohol makes a person feel more accepted in a group. | Strongly agree | Agree | Neutral | Disagree | Strongly disagree |
| 7 | In my opinion, avoiding alcohol is important for preserving religious values. | Strongly agree | Agree | Neutral | Disagree | Strongly disagree |
| 8 | In my opinion, avoiding alcohol helps a person maintain self-control and stay away from risky situations. | Strongly agree | Agree | Neutral | Disagree | Strongly disagree |
| 9 | My family expects me not to drink alcohol. | Strongly agree | Agree | Neutral | Disagree | Strongly disagree |
| 10 | My friends encourage me to drink alcohol at social events (gatherings, parties, etc.). | Strongly agree | Agree | Neutral | Disagree | Strongly disagree |
| 11 | Cultural or religious beliefs in my society strongly discourage alcohol consumption. | Strongly agree | Agree | Neutral | Disagree | Strongly disagree |
| 12 | Most people around me think that drinking alcohol is natural and acceptable. | Strongly agree | Agree | Neutral | Disagree | Strongly disagree |
| 13 | I believe that I can avoid drinking alcohol, even when people around me are drinking. | Strongly agree | Agree | Neutral | Disagree | Strongly disagree |
| 14 | If alcohol is offered to me, it is easy for me to refuse. | Strongly agree | Agree | Neutral | Disagree | Strongly disagree |
| 15 | Refusing to drink alcohol at gatherings and parties is difficult for me. | Strongly agree | Agree | Neutral | Disagree | Strongly disagree |
| 16 | I can maintain a healthy lifestyle without consuming alcohol. | Strongly agree | Agree | Neutral | Disagree | Strongly disagree |
| 17 | I plan to avoid social situations where alcohol might be consumed for the next six months. | Strongly agree | Agree | Neutral | Disagree | Strongly disagree |
| 18 | I plan to choose non-alcoholic beverages when attending social events (gatherings, parties, etc.). | Strongly agree | Agree | Neutral | Disagree | Strongly disagree |
| 19 | I intend to practice ways to say no to alcohol if it is offered. | Strongly agree | Agree | Neutral | Disagree | Strongly disagree |

| 20 | When attending social events (gatherings, parties, etc.), I choose non-alcoholic beverages. | Always | Often | Sometimes | Rarely | Never |
| --- | --- | --- | --- | --- | --- | --- |
| 21 | I avoid going to environments where alcohol is likely to be consumed. | Always | Often | Sometimes | Rarely | Never |
| 22 | I avoid consuming alcohol in various situations. | Always | Often | Sometimes | Rarely | Never |
| 23 | When stressed or under pressure, I choose more effective coping strategies instead of using alcohol. | Always | Often | Sometimes | Rarely | Never |
